# Supplementary material
Source: PubMed Central journal article supplement (PMC3145073)
Supplement: mmc1.pdf [file mmc1.pdf]

# THE LANCET

## Supplementary webappendix

This webappendix formed part of the original submission and has been peer reviewed. We post it as supplied by the authors.

Supplement to: Baigent C, Landray MJ, Reith C, et al, on behalf of the SHARP Investigators. The effects of lowering LDL cholesterol with simvastatin plus ezetimibe in patients with chronic kidney disease (Study of Heart and Renal Protection): a randomised placebo-controlled trial. *Lancet* 2011; published online June 9. DOI:10.1016/S0140-6736(11)60739-3.

# **Webappendix for “The effects of lowering LDL cholesterol with simvastatin plus ezetimibe in patients with chronic kidney disease (Study of Heart and Renal Protection): a randomised placebo-controlled trial”**

## **Tables**

|                                                                                                                                                |   |
|------------------------------------------------------------------------------------------------------------------------------------------------|---|
| Average use of study ezetimibe/simvastatin or non-study statin, and average plasma LDL cholesterol concentrations, by baseline characteristics | 1 |
|------------------------------------------------------------------------------------------------------------------------------------------------|---|

## **Figures**

|                                                                                                             |   |
|-------------------------------------------------------------------------------------------------------------|---|
| Major vascular events subdivided by type                                                                    | 2 |
| Effects on major atherosclerotic events by baseline characteristics per mmol/L reduction in LDL cholesterol | 3 |
| Cancer incidence by year of follow-up                                                                       | 4 |

|                           |          |
|---------------------------|----------|
| <b>Trial Organisation</b> | <b>5</b> |
|---------------------------|----------|

**Webtable 1: Average use of study ezetimibe/simvastatin or non-study statin, and average change in plasma LDL cholesterol from baseline, by baseline characteristics**

| Baseline characteristic                              | LDL-lowering drug use |            |                     | LDL difference (mmol/L) |              |                     |
|------------------------------------------------------|-----------------------|------------|---------------------|-------------------------|--------------|---------------------|
|                                                      | Eze/simv              | Placebo    | Absolute difference | Eze/simv                | Placebo      | Absolute difference |
| <b>Prior vascular disease</b>                        |                       |            |                     |                         |              |                     |
| Coronary disease                                     | 72%                   | 14%        | 58%                 | -0.99                   | -0.13        | 0.85                |
| Peripheral arterial disease                          | 74%                   | 14%        | 60%                 | -1.06                   | -0.19        | 0.88                |
| Cerebrovascular disease                              | 69%                   | 7%         | 63%                 | -0.98                   | -0.23        | 0.75                |
| At least one of the above 3 conditions               | 71%                   | 11%        | 59%                 | -1.01                   | -0.16        | 0.85                |
| None                                                 | 71%                   | 9%         | 62%                 | -1.00                   | -0.15        | 0.85                |
| <b>Gender</b>                                        |                       |            |                     |                         |              |                     |
| Male                                                 | 71%                   | 9%         | 61%                 | -0.97                   | -0.14        | 0.83                |
| Female                                               | 70%                   | 9%         | 62%                 | -1.05                   | -0.17        | 0.89                |
| <b>Age at randomization (years)</b>                  |                       |            |                     |                         |              |                     |
| 40-49                                                | 69%                   | 7%         | 61%                 | -0.81                   | -0.08        | 0.73                |
| 50-59                                                | 67%                   | 8%         | 59%                 | -0.99                   | -0.13        | 0.86                |
| 60-69                                                | 73%                   | 11%        | 61%                 | -1.07                   | -0.16        | 0.90                |
| 70+                                                  | 74%                   | 9%         | 65%                 | -1.11                   | -0.22        | 0.89                |
| <b>LDL cholesterol (mmol/L)</b>                      |                       |            |                     |                         |              |                     |
| <2.5                                                 | 67%                   | 7%         | 60%                 | -0.52                   | 0.12         | 0.63                |
| ≥2.5 <3.0                                            | 73%                   | 7%         | 66%                 | -0.97                   | -0.11        | 0.86                |
| ≥3.0                                                 | 73%                   | 13%        | 61%                 | -1.51                   | -0.44        | 1.07                |
| <b>HDL cholesterol (mmol/L)</b>                      |                       |            |                     |                         |              |                     |
| <1.0                                                 | 69%                   | 9%         | 60%                 | -0.84                   | -0.08        | 0.76                |
| ≥1.0 <1.2                                            | 72%                   | 9%         | 63%                 | -1.08                   | -0.19        | 0.89                |
| ≥1.2                                                 | 72%                   | 9%         | 63%                 | -1.13                   | -0.22        | 0.91                |
| <b>Not on dialysis</b>                               |                       |            |                     |                         |              |                     |
| <b>MDRD estimated GFR (ml/min/1.73m<sup>2</sup>)</b> |                       |            |                     |                         |              |                     |
| ≥60                                                  | 76%                   | 0%         | 76%                 | -0.89                   | 0.10         | 0.98                |
| ≥30 <60                                              | 75%                   | 9%         | 66%                 | -1.12                   | -0.14        | 0.98                |
| ≥15 <30                                              | 76%                   | 7%         | 70%                 | -1.20                   | -0.14        | 1.05                |
| <15                                                  | 66%                   | 10%        | 56%                 | -0.91                   | -0.19        | 0.72                |
| <b>Subtotal: Not on dialysis</b>                     | <b>73%</b>            | <b>8%</b>  | <b>65%</b>          | <b>-1.11</b>            | <b>-0.15</b> | <b>0.96</b>         |
| <b>On dialysis</b>                                   |                       |            |                     |                         |              |                     |
| <b>Dialysis</b>                                      |                       |            |                     |                         |              |                     |
| Haemodialysis                                        | 66%                   | 10%        | 56%                 | -0.75                   | -0.13        | 0.62                |
| Peritoneal dialysis                                  | 57%                   | 17%        | 41%                 | -0.79                   | -0.30        | 0.49                |
| <b>Subtotal: On dialysis</b>                         | <b>65%</b>            | <b>11%</b> | <b>54%</b>          | <b>-0.75</b>            | <b>-0.16</b> | <b>0.60</b>         |
| <b>All patients</b>                                  | <b>71%</b>            | <b>9%</b>  | <b>61%</b>          | <b>-1.00</b>            | <b>-0.15</b> | <b>0.85</b>         |

**Webfigure 1: Major vascular events subdivided by type**

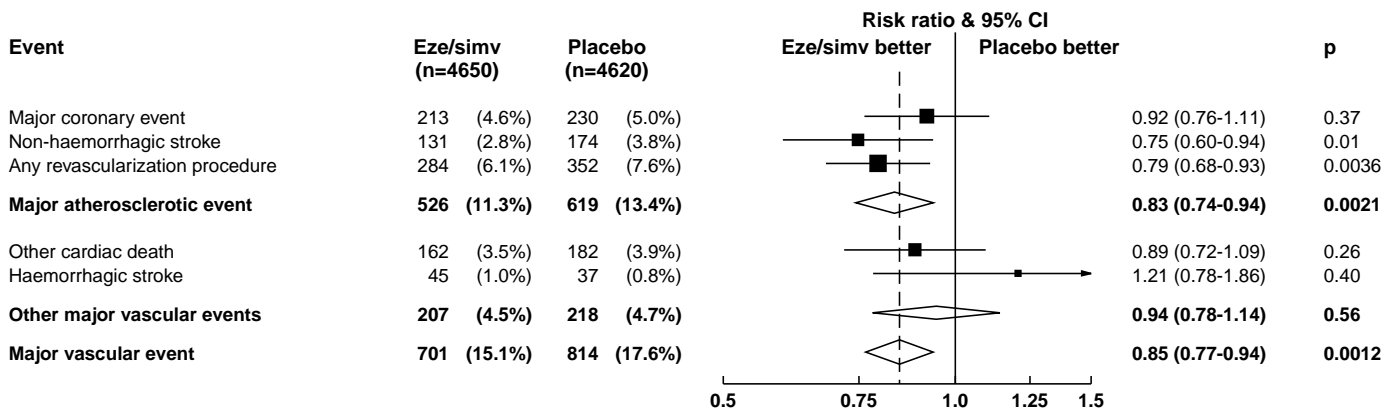

Heterogeneity between MAE and other MVE:  $\chi^2_1 = 1.21$  ( $p = 0.27$ )

**Webfigure 2: Effects on major atherosclerotic events by baseline characteristics per mmol/L reduction in LDL cholesterol**

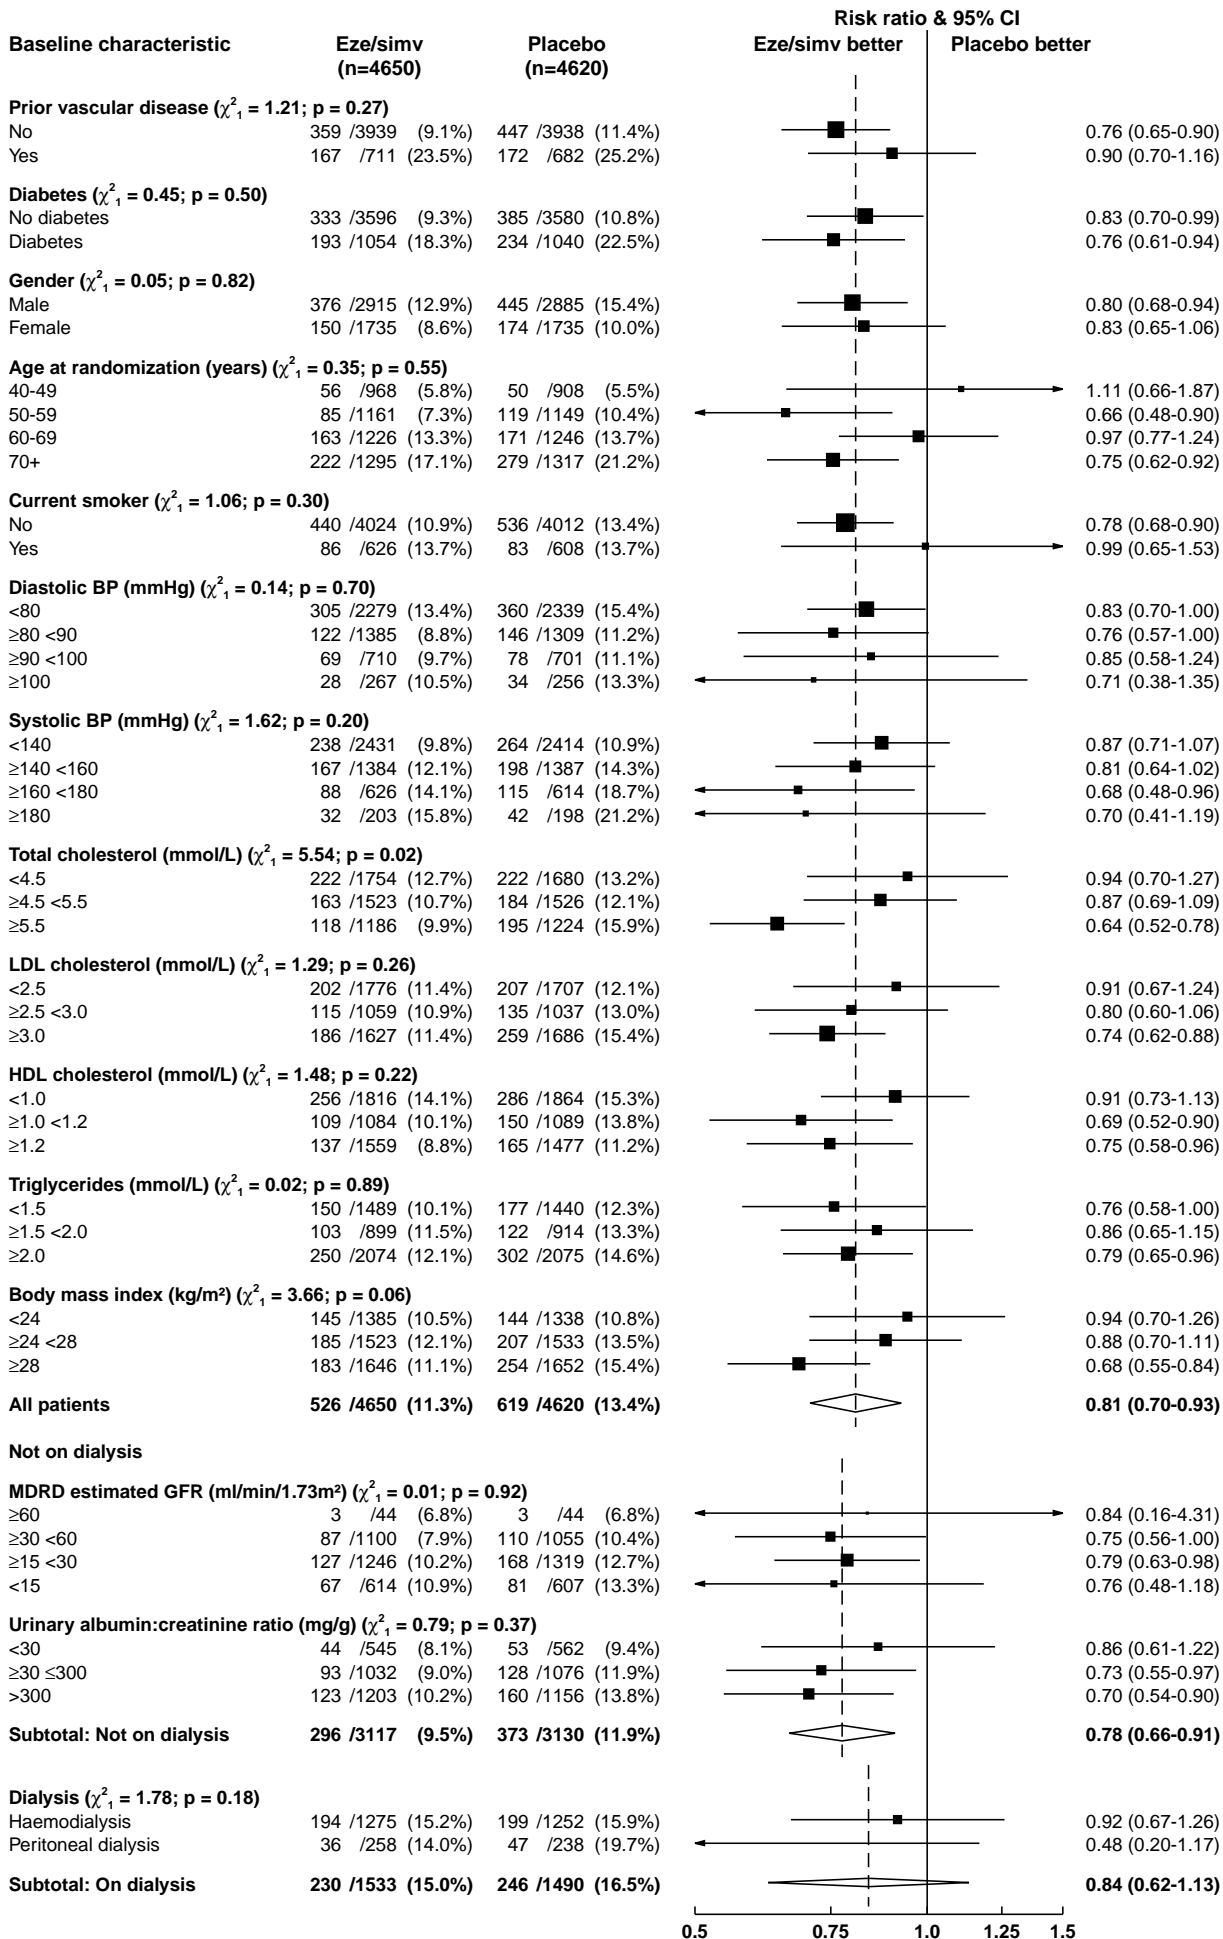

Heterogeneity between patients on dialysis and not on dialysis:  $\chi^2_1 = 0.21$  ( $p = 0.65$ )

LDL-weighted rate ratios per 1.0 mmol/L reduction were calculated using the method described by the Cholesterol Treatment Trialists' Collaboration<sup>4,5</sup>, with weights corresponding to the subgroup-specific LDL cholesterol differences at the study midpoint (2.5 years).

**Webfigure 3: Cancer incidence by year of follow-up**

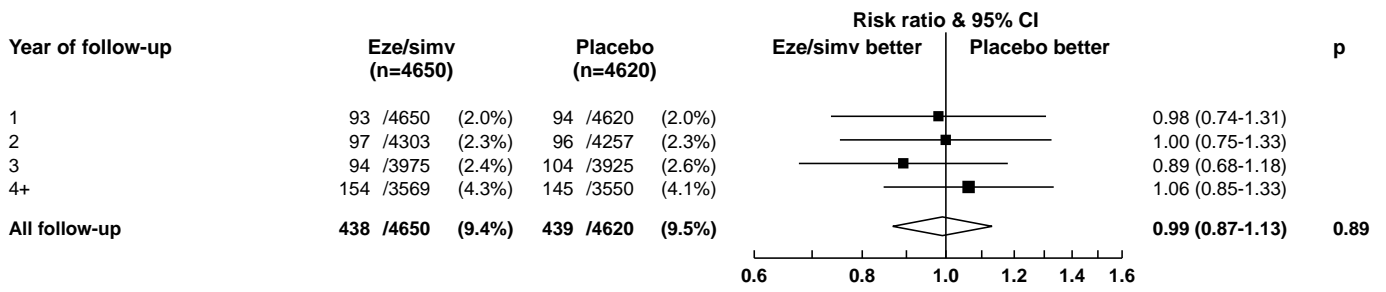

$\chi^2_1$  for trend = 0.12 (p = 0.73)

## Trial organisation

**Steering Committee:** R Collins (chair), C Baigent (study coordinator and chief investigator), M Landray (clinical coordinator and co-principal investigator), C Bray, Y Chen (administrative coordinators), A Baxter, A Young (computing coordinators), M Hill (director, central laboratory), C Knott (nursing coordinator), A Cass, B Feldt-Rasmussen, B Fellström, R Grobbee, C Grönhagen-Riska, M Haas, H Holdaas, LS Hooi, L Jiang, B Kasiske, U Krairitichai, A Levin, ZA Massy, V Tesar, R Walker, C Wanner, DC Wheeler, A Wiecek (national coordinators), T Dasgupta, D Lewis, M Mafham, W Majoni, C Reith, (clinical support), D Simpson (lay member), J Strony, T Musliner (Merck Schering Plough, non-voting), L Agodoa, J Armitage, Z Chen, J Craig, D de Zeeuw, M Gaziano, R Grimm, V Krane, B Neal, V Ophascharoensuk, T Pedersen, P Sleight, J Tobert, C Tomson.

**Independent Data Monitoring Committee:** P Sandercock (Chair); C Hill, A Keech, P Whelton, S Yusuf; Non-voting statisticians to the DMC: R Peto, J Emberson, S Parish

### International Coordinating Centre, CTSU, University of Oxford

*Senior management team:* C Baigent, C Bray, C Knott, M Landray;

*Administration:* T Bahu, E Booth-Davey, A Brewster, F Butcher, E Denis, K Frederick, D Haywood, J Heineman, S Howard, K Jayne, Z Madgwick, S Michell, K Murphy, L Ning, J Nolan, M Nunn, J Roberts, M Wickman; *Clinical support:* L Bowman, R Bulbulia, T Dasgupta, R Haynes, W Herrington, D Lewis, M Mafham, W Majoni, K Rahimi, N Rahman, C Reith; *Computing:* R Ait-Sadi, I Barton, A Baxter, M Craig, K Wallendszus, A Young, W Zhu; *Laboratory:* M Hill, S Clark, K Kourellias, M Radley; *Monitoring:* K Brown, D Worthing; *Statistics:* J Emberson; *Validation:* G Coates, B Goodenough, N Lucas.

*Outcome adjudication team:* T Bahu, F Chen, V Certikova Chabova, T Dasgupta, C Drechsler, T Forslund, L Ge, R Haynes, W Herrington, S Hjorth Husøy, M Kuzstal, M Landray, D Lewis, S Liabeuf, A Murawska, G Ong, P Phowthongkum, K Rahimi, N Rahman, C Reith, C Roaldsnes, D Schmiedeke, G Surat, M Wamil, C Wanner.

### Regional and National Coordination

**Australia:** *The George Institute for International Health, Sydney:* B Neal, A Carreras, A Cass, R Currie, E Fjalling, M Gallagher, K Gibson, J Goddard, J Healy, L Hones, M Jardine, I Kwong, C Lee, M Merai, S Murray, V Perkovic, A Rendina.

**Austria:** *Allgemeines Krankenhaus Wien, Vienna:* M Haas.

**Canada:** *St Paul's Hospital, Vancouver:* A Levin; *London Health Sciences Centre, Ontario:* K Gallo; *Penticton Regional Hospital:* S Caron; *St Paul's Hospital, Vancouver:* K Carlson, K Foley, S Matzek, L Mewhort, S O'Donoghue, A Perel-Winkler, T Terins.

**China:** *China Oxford Centre for International Health Research, Fuwai Hospital, Beijing:* L Jiang, L Li, L Ge, D Hao, X Pang, X Wei, G Yan. *CTSU, University of Oxford:* Y Chen, Z Chen, Q Nie, H Yu.

**Czech Republic:** *Charles University, Prague:* V Tesar, V Certikova Chabova.

**Denmark:** *Rigshospitalet, University of Copenhagen:* B Feldt-Rasmussen; *Smerud Medical Research Denmark, Brøndby:* H Holst, T Mølvadgaard, D Munksgaard.

**Finland:** *Helsinki University Hospital:* C Grönhagen-Riska; *Smerud Medical Research Finland, Espoo:* Y Peltonen.

**France:** *Centre de Recherche Clinique, et Services de Pharmacologie Clinique et de Néphrologie, Amiens:* ZA Massy; *Centre de Recherche Clinique, et Service de Pharmacologie Clinique, Amiens:* S Liabeuf; *Direction de la Recherche clinique, Amiens:* C Lebel, L Ouabou.

**Germany:** *Universitätsklinikum Würzburg and Zentrale für Klinische Studien am Klinikum:* B Bauer, K Bergmann, M Beusch, D Cavitt, C Drechsler, I Dulau, K Hügen, V Krane, S Kempf, B Kuchenmeister, S Küllmer, V Pscheidl, D Schmiedeke, M Schwarz, K Speerschneider, B Stahl, C Wanner.

**Malaysia:** *Hospital Sultanah Aminah, Johor Bahru:* L S Hooi; *Clinical Research Centre, Kuala Lumpur:* BC Lim, Nadia H, Zishareena M F, S Vasuthavan; *Klinsel Sdn Bhd, Kuala Lumpur:* A T Ganesapillai, S Yuen.

**Netherlands:** *Julius Centre for Health Services and Primary Care, Utrecht:* D Grobbee, I Bobbink, K Groot, I Sikking; *University Medical Center Groningen, University of Groningen:* D de Zeeuw.

**New Zealand:** *Dunedin Hospital:* R Walker; *The George Institute for International Health, Sydney:* J Raley.

**Norway:** *Rikshospitalet Universitetssykehus, Oslo:* H Holdaas; *Smerud Medical Research Norway, Oslo:* M Colban, K Smerud, N Trygg, E Waagaard, H Westad.

**Poland:** *Fundacja Dializa by Katedra i Klinika Nefrologii Endokrynologii i Ch, Katowice:* A Wiecek, S Rotkegel, U Spiechowicz; *Smerud Medical Research Poland, Warsaw:* M Domoradzka, M Gawłowska.

**Sweden:** *Njurmedicin, Medicincentrum, Uppsala:* B Fellström; *Smerud Medical Research Sweden, Uppsala:* A Flygar, I Ödmark, A Pettersson.

**Thailand:** *Maharaj Nakorn Chiang Mai Hospital:* V Ophascharoensuk; *Rajavithi Hospital, Bangkok:* U Krairittichai.

**United Kingdom:** *Royal Free Hospital, London:* DC Wheeler; *Addenbrookes Hospital, Cambridge:* S Blackwood; *CTSU, University of Oxford:* J Barclay, J Benham, R Brown, L Cureton, D Jackson, I Kennedy, C Leaper, A Taylor, C Winter, C Wise; *Leighton Hospital, Crewe:* M Nash; *Macclesfield Hospital:* A Taylor Bennett; *Princess Royal Hospital, Telford:* D Donaldson; *Queen Margaret Hospital, Dunfermline:* K Chalmers; *Southmead Hospital, Bristol:* H Corderoy.

**USA:** *Hennepin County Medical Centre, Minneapolis:* B Kasiske; *Berman Center for Clinical Research, Minneapolis:* M Bartkoske, C Bjerk, A Camarena, R Grimm, L Herskovitz, C Heuer, J Levin, R Robinson, B Wicklund; *Boston VAMC:* D Bentzel, S Cohen, C Costa, M Gaziano, R Scranton.

## Local Clinical Centres

### Australia

*Albury Base Hospital:* R Auwardt, M Boyer, P Cogdell, K Gibson; *Alfred Hospital, Melbourne:* S Menahem, J Sheldrake; *Austin Health, Melbourne:* P Mount, M Fraenkel, P Bisscheroux, J Dempester, P Gleeson; *Bendigo Health Care Group:* G Harris, C Holmes, K Hyett, A Linton; *Bundaberg Base Hospital:* P Miach, D Booth, L Druce; *Cairns Base Hospital:* M Mantha, E Borg, S Green, J Killen, Y Lynch; *Core Research Group Pty Ltd, Milton:* D Colquhoun, K Herzig, G Row, J Addison, J Asa, G Beatson, D Calvird, J Edmunds, A Ferreira-Jardim, A Gwynne, D Mackay, L McLoughlin, C Wightwick, L Williams; *Fremantle Hospital:* P Ferrari, J Barry, S Hodson, W Zakrzewska; *Gold Coast Hospital:* E Meagher, M Mulcahy, A Parnham; *John Hunter Hospital, Newcastle:* S Carney, L Garvey, A Gillies, S Hayes; *Launceston General Hospital:* M Mathew, R Fassett, L Anderson, C Clingeffer, A Curnock, L Mayne, D Richardson, M Smith, S Smith; *Liverpool Hospital:* M Suranyi, K Howlin, J Chow, B Cleland, G Rayment, T Spicer, J Wong, M Wong; *Melbourne Renal Research Group:* D Packham, C Alison, I Fraser, J Mitchell, J Nagle; *Monash Medical Centre, Clayton:* F Brown, C Ellery, J Monkhouse, J Nandkumar, L Reith-Myers; *Nambour General Hospital:* N Gray, C Cocks, M Courtney, P Hollett, C Johnston, H Larsen, S Murray, A Pollock, S Stewart, G Styles; *Nepean Hospital, Penrith:* R Wyndham, M Fanning, W Gibson, S Jackson, M Mannering, E Mercado, R Oliphant, K Sud, N Ubera, C Wood; *Peninsula Clinical Research Centre, Queensland:* J Karrasch, T Brinkley, K Estensen, A Moroney, J Sutton, R Warren; *Pine Rivers, Chermiside:* D Saltissi, H Jahke, H Roach, J Saltissi (Cockayne), M Wiederroth O'Brien; *Princess Alexandra Hospital, Woolloongabba:* D Johnson, V Bali, J Edmunds, M Evans, K Franzen, S Halbish, J Helyar, A Martin, D Mudge, K Sonnenburg, J Sudak; *Renal Research, Gosford:* S Roger, S Almeida, H Andrews, L Bohringer, L Bouwhuis, L Brady, A Carpenter, S Warren; *Royal Adelaide Hospital:* T Elias, K Bannister, G Chew, J Clarke, R Faull, A Hooper, L Jeffs, A Napier, C Peh, K Pirone, F Skilton; *Royal Brisbane Hospital:* D Ranganathan, J Best, L Hart, H Healy, C Morgan, S Ratanjee, A Salisbury; *Royal Hobart Hospital:* M Jose, J Freeman, R Hamilton, G Kirkland, G Read; *Royal Melbourne Hospital:* R



Walker, V Perkovic, H Anderson, K Boekel, M Farrell, A Foreman, K Iliev, E Pedagogos, T Raspudic; *Royal North Shore Hospital, St Leonards*: C Pollock, B Cooper, J Kesselhut, C Macadam, J Pearse, C Rowland, H Tully; *Royal Perth Hospital*: A Irish, G Dogra, P Coutts, L Hayes, D Khoo, B Nathoo, K Shakespeare, A Warger; *Royal Prince Alfred Hospital, Sydney*: A Gillin, J Burman, C George, S Sherwood, P Snelling, C Stevens; *Sir Charles Gairdner Hospital, Perth*: B Hutchison, G Luxton, J Barry, N Devenny, L Hayes, H Herson, S Pellicano; *St George Hospital, Kogarah*: J Kelly, J Coutelas, C Garlinge, A McClelland, S Pirabhahar, H Saleh; *St Vincent's Hospital, Fitzroy*: R Langham, B Englebright (Joseph), M Giang, M Lanteri, K Mullins, C Turner; *Sydney Adventist Hospital*: P Collett, S Stokoe, K Sutherland, D Talafua; *The Canberra Hospital*: G Talaulikar, A Clarkson, M Gallagher, C Rees, G Carney, M Falk, D Gracey, A Jadeer, P Johnson, K Karpe, R Singer, G Walters; *The Queen Elizabeth Hospital, Adelaide*: S McDonald, J Burgess, K Fischer, M Gentgall, M Hockley, D Veitch; *The Townsville Hospital*: P de Jersey, A Gillam, V Hartig, K Holland, J McArdle, W Washington; *Westmead Hospital*: G Rangan, M Mikaheal, P Murie, N Perez, N Punnoose, T Smolonogov, N Taler, G Williams; *Wollongong Hospital*: C Wen, J Kohlhagen, J Wessels, S Johnson, A Reid, J Ryan, D Taprell.

### **Austria**

*Allgemeines Krankenhaus Wien*: M Haas, M Auinger, M Eigner, K Kodras, C Leithner, L Magpantay, C Marterer, R Prager, C Prinz; *Klinikum Wels-Grieskirchen*: E Seiringer, R Kramar, E Mitter, H Stummvoll, G Dieplinger, E Seiringer; *Krankenhaus Zell am See*: R Wenzel, G Stolz, S Dröse, E Edlinger, E Headlam-Leitner, H Miska, M Then, S Weninger; *Landeskrankenhaus Feldkirch*: K Lhotta, U Neyer, H Dickie, S Smodek, H Sprenger-Mähr; *Universitätsklinik für Innere Medizin Innsbruck*: A Rosenkranz, E Zitt, B Mayr, A Schinner.

### **Canada**

*Charles LeMoyné Hospital, Greenfield Park*: G Soltys, V Bégin, S Brunet, S Cournoyer, M Gelinas, C Giroux, J Martineau, M Roy, L Savoie; *CHUQ- Hotel Dieu de Québec*: M Agharazii, J Blouin, S Desmeules, S Langlois, F Samson; *Credit Valley Hospital, Mississauga*: G Wong, L Constantini, J Jing, J Malko, C Rivers, D Rochester, C Skilling, A Wadgyamar, G Wu; *David M. Kates Medical Services Inc. Kelowna*: D Kates, J Husch, M Mantle, L Turri; *Eastern Regional Health Authority, Newfoundland*: B Barrett, B Curtis, B Greeley, M Hannaford, J Harnett, M Kelly, E Langille, J Morgan, S Murphy; *Fraser Health Authority, Vancouver*: M Karim, T Arbo, G Carpenito, A Cass, V Chan, G DaRoza, K Foley, M Friesen, D Kraus, S Lam, B Lange, S Minhas, R Starko, S Torng, K Vela; *Hôpital du Sacré-Coeur de Montréal*: F Madore, P Roy, S Troyanov; *Hopital Maisonneuve-Rosemont, Montréal*: A Bonnardeaux, L Lauzon, V Pichette; *Kingston General Hospital/Queen's University*: K Yeates, K Mahoney, C Myers, R Pilkey; *London Health Sciences Centre*: L Moist, M Edgar, K Gallo, A House, C Kortas, S Mindorff; *OTT Healthcare Inc. Scarborough*: P Tam, S Chow, J Fung, G Nagai, P Ng, D Rochester, T Sikaneta, R Ting; *Penticton Regional Hospital*: B Forzley, S Caron, Y Clouatre, S Cooper, H DaCosta, S Granger, S Valley; *Regina Qu'Appelle Health Region*: S Karunakaran, M Abdulhadi, C Altwasser, S Anderson, L Bergquist; *Royal Inland Hospital, Kamloops*: C Wijeyesinghe, L Berst; *Royal Jubilee Hospital, Victoria*: K Horgan, K Coles, T Lotter, L Robson; *Royal Victoria Hospital, Montreal*: P Barre, J Golden, M Golden, N Tanguay; *St. Boniface General Hospital, Winnipeg*: C Rigatto, S Armstrong, A Fine, B Fontaine, D Friesen, S Henry, M Kraushar, M Reslerova, M Verrelli; *St. Joseph's Healthcare, Hamilton*: C Rabbat, C Clase, G Suva, N Winegard; *St. Michael's Hospital, Toronto*: M Goldstein, S Curvelo, S Donnelly, J Huckle, R Marticorena; *St. Paul's Hospital - Vancouver*: A Levin, C Chan-Yan, A Chiu, L DeLuca, D Flamer, K Foley, J Gill, A Jamal, B Jung, M Kiaii, D Kraus, D Landsberg, S Minhas, A Perel-Winkler, N Rozen, P Taylor, K Vela, R Werb; *St. Paul's Hospital Saskatoon*: G Pylypchuk, A Ahmed, J Barton, M Hundseth, J Kappel, I Keindel, J Klassen, S Pylypchuk, M Rindall; *Sunnybrook Health Sciences Centre, Toronto*: S Tobe, D Naimark, M Agelopoulos, M Chessman, M Hladunewich, N Perkins, S Sainsbury; *Thunder Bay Regional Health Sciences Centre*: W McCready, B Adams; *University of Alberta Hospital*: M Tonelli, S Caldwell, U Kumar, A McMahon, S Nikitin, J Restall, S Treit, Y Wysocki; *Vancouver General Hospital*: J Duncan, M Copland, J Jastrzebski, P Keown, S Kwan, A Levin, D Rogers, J Shapiro, S Singh, L Sioson, K Yee, C Yeung; *Winnipeg Health Sciences Centre*: J Zacharias, J Bueti, B Dizon, H Lam, L Miller, M Ross, M Zarrillo.

### **China**

*Baotou Medical College First Affiliated Hospital, Inner Mongolia*: Z Li, C Wang, L Liu; *General Hospital Of Shanyang Army, PLA of China, Liaoning*: M Hong, H Zheng, W Zuo; *Inner Mongolia Baogang Staff Hospital*: Z Ge, Q Liu, Y Li; *Inner Mongolia Baotou City Central Hospital*: K Sun, R Zhao; *Inner Mongolia Electrical Power Central Hospital*: G Sun, F Wang; *Inner Mongolia Hulunbeiermeng Hospital*: Z Cui; *Jilin Province Jilin City Central Hospital*: L Liu, F Lou; *Jilin Provincial Hospital*: Y Du, L Song, H Huang; *Lanzhou University Second Affiliated Hospital*: Z Song, J Wang, L Zhou; *Liaoning Angang Lishan Hospital*: R Wu, R Xiao, Q Zhang; *Liaoning Provincial People's Hospital*: N Duan, N Ju, Z Li; *PLA 306 Hospital, Beijing*: A Wang, Z Xu,

Z Lu; *Shangdong Weifang People's Hospital*: Y Zhang, L Zhao; *Shenyang Fourth People's Hospital*: Y Li, C Zhang; *The Third Xiangya Hospital of Central South University, Hunan*: Z Mo, Y Xie, J Xiong; *Wuhan City Central Hospital*: J Chen, L Guo, S Zhao.

### **Czech Republic**

*Charles University, Prague*: M Peiskerova, E Jancova, M Kazderova, L Kobrova; *Csl. Armady 1076 - HDS Eurocare, Usti nad Orlici*: P Gorun; *FNKV - Fresenius Dialysis Unit, Prague*: T Kmentova; *Institute for Clinical & Experimental Medicine IKEM, Prague*: M Burgelova, L Lyerova, O Viklicky; *Kukucinova - Fresenius Dialysis Unit, Prague*: M Berdych; *Nemocnice Strakonice - dialyza*: Z Nydlova, G Jelinkova, J Moltaš; *Nemocnice, Jihlava*: T Pauzar, P Knetl, J Cahova, J Simkova, M Zakova; *Nusle - HDS Eurocare, Prague*: S Vankova, R Safarova; *Parallel 50 - HDS Eurocare, Prague*: M Hruby, R Karlova, V Prikaska, P Sellenberg; *Plzen - HDS Eurocare*: E Vesela, L Malanova; *Sokolov - Fresenius FMC Dialysis Unit*: J Vlasak, P Kaprova, D Novakova; *Teplice - HDS Eurocare*: K Kotherova, M Studenovska.

### **Denmark**

*Aalborg Hospital, Aarhus University Hospital*: JH Christensen, J Sølling, M Jepsen, V Kristensen; *Rigshospitalet, University of Copenhagen*: B Feldt-Rasmussen, H Aerenlund, M Bræmer-Jensen, A Kamper, S Raaschou; *Herlev Hospital, University of Copenhagen*: J Heaf, J Dreyer, P Freese, M Holm, M Munch; *Hillerød Sygehus*: E Gade-Rasmussen, K Bredmose, H Daugaard; *Holbæk Sygehus*: J Nielsen, M Friedberg, D Jensen, M Munk Pulm, K Sølling; *Odense Universitetshospital*: H Dieperink, L Arp Nielsen, E Friberg, A Gløe-Jakobsen, P Thye Rønn; *Roskilde Sygehus*: K Rasmussen, C Andersen, A Johansen, L Ødum, O Østergaard, L Pedersen; *Sønderborg Sygehus*: H Dieperink, S Lykkegaard, M Aundal, L Arp Neilsen, S Faureholm Huess, P Freese, E Friberg, A Gløe-Jakobsen; *Viborg Sygehus*: H Danielsen, JK Madsen, M Nyvang.

### **Finland**

*Helsinki University Hospital*: A Ekstrand, H Boman, J Hartman, A Lipponen, R Lithovius, V Rauta, A Salmela, K Saloranta; *Keski-Suomen Central Hospital, Internal Medicine Clinic, Jyväskylä*: T Forslund, P Koskiaho; *Pohjois-Karjala Central Hospital, Internal Medicine Department, Joensuu*: K Jääskeläinen, M Kanninen; *Satakunta Central Hospital, Pori*: K Laine, M Asola, J Huhti, M Pentti; *Turku University Hospital*: K Metsärinne, M Heiro, N Koivuviita, M Saarinen, R Tertti.

### **France**

*Amiens*: ZA Massy, G Choukroun, A Fournier, S Liabeuf, L Ouabou; *Besancon*: D Ducloux, F Marechal, D Simula Faivre; *Bordeaux*: C Combe, M Douillet, T Lamblot, H Nardi, B Vendrely; *Brest*: B Bourbigot, C Harontel, S Ferlandin; *Grenoble*: P Zaoui, C Jouet; *Harfleur - Clinic du Petit Colmoulins*: S Geffroy-Guiberteau, L Bugnazet; *Limoges*: J Aldigier, C El Hamel-Belili, S Giraud; *Marseille*: B Dussol, Y Berland, M Chollet, H Sichez; *Montpellier*: J Cristol, B Canaud, M Morena, A Rodriguez; *Nancy*: M Kessler, B Mizejewski, B Risse; *Paris - Clinique du Landy*: P Urena Torres, M A Bou-Bekr, C Arezki, P Ras el Qdim; *Perpignan - Hopital Saint Jean*: C Vela, F Borsato, A Talairach; *Pessac - Clinique Saint Martin*: M Normand, V Normand; *Reims*: P Rieu, B Gauthier, C Vigneron-Foy, A Wolak; *Vannes - Centre de Dialyse ECHO*: V Menoyo, L Alos; *Vienne*: A Caillette-Beaudoin, V Berger.

### **Germany**

*Ambulante Dialyse / Gemeinschaftspraxis Augsburg*: S Al-Sarraf, I Konnerth, C Urban; *Brüderkrankenhaus Trier*: S Weiner, W Boesken, E Jochum, C Kiefer, A Wagner; *Deutsche Klinik für Diagnostik GmbH Wiesbaden*: B Krumme, J Böhler, B Bonow, U Hohenstatt, T Mettang, A Röckel; *Dialyse Reutlingen*: J Langanke, H Lipponer, G Dunschen-Weimar, R Dunst, E Hübel; *Dialyse Rhein-Ahr, Bad Neuenahr-Ahrweiler*: R Petrik, R Rengel, M Schmidgen; *Dialysepraxis Altötting*: H Mayr, C Garschhammer, S Weirauch; *Dialysepraxis Arnstadt*: H Anger, T Gööck, A Mai; *Dialysepraxis Leipzig*: I Bast, C Süptitz; *Dialysepraxis Meiningen*: B Iwig, K Florschütz, R Haßelbacher, G Sauerbrey, S Delrieux, S Rau; *Dialysepraxis Seehausen*: M Poley, R Laux, O Schönfelder; *Dialysezentrum / Gemeinschaftspraxis Heilbronn*: G Kunowski, G Fuchs, K Hoffmann, R Schürger; *Dialysezentrum Bad Godesberg, Bonn*: K Brensing, Z Güven, C Immenkamp, C Kottmann, H Schmitt; *Dialysezentrum Bad Laasphe*: M Schulz, P Arnold, R Knaup, H Schneider, H Siemsen; *Dialysezentrum Bad Malente*: P Pyriki, F Körkemeyer, R Pyriki, A Siebrecht; *Dialysezentrum Bovenden*: E Schulz, A Krumwiede, D Kruse, S Lücke; *Dialysezentrum Darmstadt*: H Keim, H Fink, S Fischer, A Klingbeil, K Kuhlmei, N Ortwein-Horn; *Dialysezentrum Dormagen*: L Merker, B Bayer, K Benamar, S Emmert, E Floten, K Holzheuer, M Lummer, E Ossendorf, M Scholz; *Dialysezentrum Halberstadt*: M Oppitz, L Georgiew, C Tripps, M Wendehake; *Dialysezentrum Heiligenstadt*: D Lange, V Pingel; *Dialysezentrum Jacobistraße Düsseldorf*: M Brause, W Schanze, E Duygulu; *Dialysezentrum Karlstraße Düsseldorf*: F Dellanna, S Heinemann-Nieberding, C Stürmer, K Wiczorek, O Zarga; *Dialysezentrum Küllmer, Kirchlain*: B Küllmer, S

Küllmer, M Akin, M Gondolf, S Schütterle; *Dialysezentrum Pirmasens & Kusel*: G Walker, R Bertsch, M Seul, J Allendorff, R Siehler, S Stemmler; *Dialysezentrum Rüsselsheim*: M Baldus, A Adler, S Härter, W Würmell; *Dialysezentrum Saarlouis*: M Möller, C Hame, M Müller, M Schreiber, C Schürfeld; *Dialysezentrum Schöneberg-Tempelhof Berlin*: M Millington-Herrmann, A Benschneider, J Gaffal, U Sprünken; *Dialysezentrum Wilhelmshaven*: M Bohling, M Bohling, S Wunderlich; *Dialysezentrum Würzburg*: L Schramm, C Kollenbrath, K Netzer, T Sieber, J Zimmermann; *Gemeinschaftspraxis am Sophienhof Kiel*: M Bellersen, M Uerkvitz; *Gemeinschaftspraxis Kiel*: T David-Walek, B Hauschildt, G Leimenstoll; *Gemeinschaftspraxis Langenhagen*: G Lonnemann, M Hilfenhaus, C Benedetto, S Stöckmann; *Gemeinschaftspraxis Marktredwitz & Selb*: P Ichtariis, A Jungmann, K Neumeier, A Stoof; *Gemeinschaftspraxis Nürnberg*: K Böhmer, A Kirpal, A Knogl; *Gemeinschaftspraxis Schloß Holte-Stukenbrock*: F Flege, K Franke, P Groth, E Parenzen; *Internistische Gemeinschaftspraxis Alzey*: M Böckmann, P Przyklenk; *Internistische Gemeinschaftspraxis und Dialyse Friedrichshafen*: L Piazzolo, L Thinius-Jaudas, A Versen; *Internistische Praxisklinik Kempten*: R Hettich, R Arendt, K Geiger, H Hoppe; *Johannes Gutenberg-Universität Mainz*: A Schwarting, T Beyer, J Faust, A Hazenbiller, S Tschirner; *KfH Nierenzentrum Bamberg*: C Grupp, O Dorsch, M Eigner-Schmidtchen, K Michler, J Roth, S Schramm, G Waldmüller; *KfH Nierenzentrum Bayreuth*: B Riedl, H Vögele-Dirks, J Linz; *KfH Nierenzentrum Coburg*: P Biggar, H Hennemann, G Bauer, J Buchholz, P Fischer; *KfH Nierenzentrum Donauwörth*: W Bihlmaier, A Baumann, B Peichl; *KfH Nierenzentrum Eberswalde*: S Röser, S Ludewig, M Ricksgers, M Szendzielorz; *KfH Nierenzentrum Frankfurt/Oder*: A Baus, K Baust, P Schaller, G Schnellbacher, S Sörensen; *KfH Nierenzentrum Fürth*: B Büschges-Seraphin, L Hauenstein, B Hofmann, J Nikolay; *KfH Nierenzentrum Köln-Merheim*: F Merkel, M Nebel, J Petersen, S Schweb; *KfH Nierenzentrum Kulmbach*: H Zeißler, K Baumhackel, A Krauß; *KfH Nierenzentrum Marl*: R Schäfer, A Pastor, B Zielinski; *KfH Nierenzentrum Trier*: H Strauß, H Theis; *KfH Nierenzentrum Weißenburg*: K Burkhardt, M Heckel, K Hussendörfer; *KfH Nierenzentrum Würzburg*: U Bahner, M Brandl, B Hammerl-Kraus, D Herrmann, H Kramer, H Baudenbacher, C Blaser, G Buschmann, G Eckert, H Ehrlich, K Hofmann, U Hüller; *Klinikum der Johann Wolfgang Goethe Universität Frankfurt*: H Geiger, B Becker, S Hoischen, C Bartel, J Hennig, N Obermüller, C Schulte; *Klinikum der LMU München*: M Fischereeder, F Burchardi, H Rupprecht, S Weidner, H Anders, L Andriaccio, S Lederer, G Ricken, C Straßer; *Klinikum Mannheim der Universität Heidelberg, Mannheim*: A Lammert, W Schmitt, F van der Woude, B Langhäuser; *Martin-Luther-Universität Halle*: S Markau, B Osten, D Thiemicke, O Dorligschaw, M Weickert; *Medizinische Universitätsklinik Würzburg*: B Bauer, R Götz, V Krane, F Breunig, G Denninger, S Osiek, W Rebstock, P Schulz, F Swoboda, K Bergmann, D Cavitt, D De Cicco, C Drechsler, I Dulau, J Harlos, B Kuchenmeister, A Lebert, V Pscheidl, M Riegel, T Schmiedeke, K Speerschneider, B Stahl; *Nephrologische Gemeinschaftspraxis Hamm-Heessen*: U Hoffmann, M Nölle, P Jankrift, H Pfeleiderer, J Witta, B Wittler; *Nephrologische Gemeinschaftspraxis im Heidering Hannover*: J Lüth, H Dumann, U Häbel, A Torp; *Nephrologische Gemeinschaftspraxis Rostock*: D Sehland, M Tieß, C Etzold, A Friederiszik; *Nephrologische Praxis & Dialysezentrum Elsenfeld*: A Morgenroth, A Dybala, A Suffel; *Nephrologische Praxis Berlin-Köpenick*: T Leimbach, J Kron, S Sauer; *Nephrologische Praxis Dr. Meyer Bad Nauheim*: T Meyer, M Meyer; *Nephrologische Praxis und Dialyse Oldenburg*: U Lammers, J Bekman, S Holtz, B Kausler-Book, S Stobbe; *Nephrologisches Zentrum Emsland, Lingen*: H Hohage, M Heck, F Schulte, U Welling, M Zeh; *Nephrologisches Zentrum Pforzheim*: J Seyfried, T de Heij, A Menzinger; *Nephrologisches Zentrum Villingen-Schwenningen*: T Weinreich, M Hopf; *Nephrologisches Zentrum Weißensee Berlin*: J Groll, K Kammholz, K Peters, G Schwietzer; *PHV-Dialysezentrum Hildesheim*: B Kreft, U Weibchen; *Praxis Dr. André Voßkühler Bottrop*: A Voßkühler, M Hollenbeck, K Klaue, E Rzepucha, K Sperling; *Praxis für Nierenkrankheiten und Dialyse Berlin*: W Seeger, J Weyer, C Heine, P Kirste, B Zemann; *Robert-Bosch-Krankenhaus Stuttgart*: D Alscher, A Menzinger, D Rumpf, B Wullen, A Bengel, B Friedrich, T Kirschner, U Knödler, C Machleidt, K Niederstrasser, E Noack, J Wilhelm; *St. Johannes-Hospital Dortmund*: H Heuer, J Dulea, R Piolot, M Rudke, G Treinen, B Elberg, J Hanke, T Nitschke, C Rosendahl, A Schmitz, H Schneider; *St. Josefs-Hospital Cloppenburg*: J Schrader, A Kulschewski, C Lübcke, F Hammersen, S Lüders, U Venneklaas; *Universitätsklinikum Aachen*: A Mühlfeld, F Arabi Al-Khanne, M Ketteler, D Politt, C Schuster, F Eitner, U Göretz, S Heidenreich, U Janssen, A Kranz, E Moormann, B Schneider, W Weber; *Universitätsklinikum Charité, Campus Virchow-Klinikum, Berlin*: U Frei, T Jovanovic, H Asmus, S Canaan-Kühl, L Pannier, S Petersen, M Plüer, E Schaeffner, C Schäfer, S Warncke; *Universitätsklinikum Erlangen-Nürnberg*: R Schmieder, C Donhauser, B Schulze; *Universitätsklinikum Göttingen*: M Koziolk, W Bechtel, B Kurz, E Noack, F Strutz, C Bramlage, S Dreyer, E Mommeyer, J Niemann, A Scheel, I Troche-Polzien, F Weber; *Universitätsklinikum Homburg/Saar*: G Heine, M Girndt, F Lizzi, K Rogacev; *Universitätsklinikum Leipzig*: T Lindner, H Achenbach, K Peschel, J Beige, S Jentho, C Kreyßig, K Prill; *Universitätsklinikum Schleswig-Holstein, Campus Kiel*: L Renders, M Scholz, J Walcher, S Cerny, A Fülbier, H Kristen; *Universitätsklinikum Schleswig-Holstein, Campus Lübeck*: M Nitschke, J Kramer, P Marek, M Meier, J Schlieter; *Universitätsklinikum Tübingen*: N Heyne, F Bachmann, M Faber, K Klipp, U Küstner, T Risler; *Westpfalz-Klinikum Kaiserslautern*: T Rath, T Ruf, D Budiman, C Seidel, S Weik.

## Malaysia

*Hospital Ipoh*: S M Teo, L Y Lee, Azizah H, Faridunishah S A, S M Foo, K W Go; *Hospital Kuala Lumpur*: Ghazali A, K H Koh, Zaki M, H S Wong, S Bavanandan, L M Boey, Lily M, S L Wong, Rosnawati Y; *Hospital Kuala Trengganu*: Zawawi N, Azimawati A, Hindun A, Hasnah J; *Hospital Melaka*: Korina R, Yunaidah A, Noraidah P; *Hospital Pulau Pinang*: L M Ong, Noor Asma A, Y F Liew, Rozina G, Y H Cheong, A H Ang, Dayang J, L S Lim; *Hospital Raja Perempuan Zainab II, Kota Bharu, Kelantan*: Sukeri M, Ramli S, Zulkifli M, Wan Mahmood W K; *Hospital Selayang*: H S Wong, B L Goh, Ghazali A, Sarifah B, B C Bee, Lily M, C Ramasamy, Ruszarimah S; *Hospital Sultanah Aminah, Johor Bahru*: L S Hooi, W J Liu, Razali O, Haslinah S; *Hospital Taiping*: I Vaithilingam, Jaaini A, Faridah L; *Hospital Tengku Ampuan Afzan, Kuantan, Pahang*: Ramli S, K H Ng, P Krishnan, Rosnah A A, Nor Azizah A S, C C Tam, S H Tan; *Hospital Tengku Ampuan Rahimah, Selangor*: C C Tan, Shahnaz F K, Wazir H, P Munusamy; *Hospital Tuanku Jafa'ar, Seremban*: Wan Shaariah M Y, T F Chew, Fuziah Z; *Hospital Umum Sarawak*: C H H Tan, Maria L, Javelin P; *University Malaya Medical Centre, Kuala Lumpur*: S K Lim, Nazatul S B, L P Engkasan, S Y Tan, M G Wong, Julita A A, B B Ang, S Krishnan, W W T Seet, S K Liew, T C Keng.

## Netherlands

*Diakonessenhuis Zeist/Utrecht*: T Tobé, M Deelen, I Klaassen; *Laurentius Ziekenhuis*: W Grave, M Emmen; *Martini Ziekenhuis*: W Janssen, W Bossen, B Elzinga, A van der Velden; *Medisch Centrum Leeuwarden*: M Hemmeler, M Slagman, F Waanders; *Sint Gemini Ziekenhuis*: P Viergever, I Boerema; *Sint Lucas Andreas Ziekenhuis*: B Potter van Loon, B Muthert; *St Antonius Ziekenhuis*: T Geers, N Schollaert, I van Weverwijk, P Veen; *Twenteborg Ziekenhuis*: A Woittiez, J Krikken, A Kwakernaak, F Visser; *University Medical Centre Groningen*: G Navis, F Hoekstra, J Krikken, A Kwakernaak, M Slagman, F Visser, F Waanders.

## New Zealand

*Auckland City Hospital*: L Williams, S Hawkins; *Christchurch Public Hospital*: D McGregor, J Usher; *Dunedin Hospital*: R Walker, R MacGinley, J Schollum, G Ellis; *Middlemore Hospital, Auckland*: D Voss, J Rosman, M Upjohn; *Palmerston North - MidCentral Health*: N Panlilio, K Madhan, Y Li, V Naicker; *Taranaki Base Hospital, New Plymouth*: N Panlilio, K Madhan, E Anderson, M Bushell, N Lumb, B Pepperell; *Waikato Hospital*: P Sizeland, S Hayett, N Sullivan, C Tuffery; *Wellington Hospital*: A Macdonald, T Ostapowicz.

## Norway

*Dr. Terje Wessel-Aas*: T Wessel-Aas, H Wessel-Aas; *Nordlandssykehuset HF*: E Bjørnbæk, R Bjørnbæk; *St. Olavs Hospital*: I Simsø, C Øien; *Stavanger Universitetssykehus*: H Bergrem, S Espedal; *Sykehuset Innlandet Lillehammer*: J Kronborg, K Solbakken; *Sykehuset Levanger*: J Rocke, O Aakervik, V Haugen; *Sykehuset Østfold*: T Eide, J Berglund, W Løland, T Schei, C Strømsæther, H Willadsen; *Sykehuset Telemark*: P Lyngdal, A Vad; *Ullevål Universitetssykehus*: B Waldum, G Frøslid, C Roaldsnes, D Rustad, P Söderblom; *Universitetssykehuset Nord-Norge HF*: B Eriksen, E Hanssen, J Julsrud, U Mathisen, M Pedersen, M Rumsfeld, I Toft; *Vestre Viken HF Kongsberg Sykehus*: K Berget, K Landsverk, G Tveiten, H Wamstad.

## Poland

*Akademicki Szpital Kliniczny, Wrocław*: M Klinger, M Krajewska, T Golebiowski, M Kusztal; *Fundacja Dializa by Katedra i Klinika Nefrologii Endokrynologii i Chorob, Katowice*: A Więcek, S Rotkegel, U Spiechowicz-Zaton; *SP Szpital Kliniczny nr 1 - Uniwersyteckie Centrum Kliniczne AM, Gdansk*: B Rutkowski, M Renke, L Tylicki; *SP Szpital Kliniczny nr 2 AM, Poznan*: S Czekański, L Koziol, M Wanic-Kossowska, A Wasik-Olejnik; *SP ZOZ Uniwersytecki Szpital Kliniczny nr 1 Uniwersytetu Medycznego w Łodzi*: M Nowicki, P Dryja, I Kurnatowska, A Zawiasa; *Szpital Kliniczny Dzieciatka Jezus, Centrum Leczenia Obrazen, Warszawa*: M Cizek, M Gomółka; *Wojewódzki Szpital Specjalistyczny in Białystok*: M Mysliwiec, S Brzóska, M Mazerska; *Wojewódzki Szpital Specjalistyczny in Wrocław*: Z Hruby, K Koscielniak, M Stanek-Piotrowska; *Wojewódzki Szpital Specjalistyczny nr 4, Bytom*: J Mesjasz, R Rudka, M Barański, J Mesjasz; *Wojewódzki Szpital Specjalistyczny nr 5, Sosnowiec*: J Jupowiecki, D Klein; *Wojewódzki Szpital Zespólny, Plock*: M Switalski, M Kuriga, M Ostrowski.

## Sweden

*Akademiska Sjukhuset, Uppsala*: B Fellström, Å Lidman, T Linde, K Waltersson; *Centralsjukhuset Karlstad*: L Weiss, G Andersson, C Lindell, G Welander; *Danderyds Sjukhus, Stockholm*: S Jacobson, P Edensjö, J Wallin; *Falu Lasarett*: M Linder, M Karsberg, K Hellgren, I Lönn; *Länssjukhuset Ryhov, Jönköping*: C Frisette-Fich, A Johansson, A Lundström, N Mauritz, A Ståhl-Nilsson, N Tobafard; *Mälarsjukhuset, Eskilstuna*: O Hellberg, E Ejemar, N von Schmalensee; *Mora Lasarett*: T Gunne, A Eriksson, S Östberg, C Svensson; *Norra Älvsborgs Länssjukhus, Trollhättan*: H Mulec, A Jacobsson, M Karlsson, L Önnermalm; *Nyköpings Lasarett*: S Osagie, U

Ekengren, M Larsson; *Östersunds Sjukhus, Östersund*: K Lindberger, A Olofsson; *Sahlgrenska Universitetssjukhuset, Göteborg*: O Samuelsson, L Beagan, H Dezfoolian, M Just, L Örtegren, A Saeed, U Strand; *Skaraborgs Sjukhus, Skövde*: B Ramsauer, D Hultström, K Nordlinder, I Sundberg; *Universitetssjukhuset i Lund*: B Öqvist, C Green; *Universitetssjukhuset Linköping*: A Fernström, A Cassel, I Göransson, M Gylling, A Jörgensen; *Universitetssjukhuset MAS Malmö*: G Sterner, A Christensson, P Hjelmstedt, A Nyström; *Universitetssjukhuset Örebro*: P Sundin, I Samuelsson, M Tidman, M Johansson, M Löfgren Andersson, M Öhman; *Vrinnevisjukhuset Norrköping*: P Andersson, A Hallberg Karlsson, L Ringstad.

## Thailand

*Bhumibol Adulyadej (Royal Thai Air Force) Hospital, Bangkok*: A Chittinandana, W Chailimpamontree, P Gojaseni, R Singprasert; *King Chulalongkorn Memorial Hospital, Bangkok*: K Tungsanga, W Amphun, P Intim, T Kanjanabuch, D Poowarattanakul, C Treratha, P Wongvan; *Maharaj Nakorn Chiang Mai Hospital*: V Ophascharoensuk, S Jittikanont, T Suriya; *Rajavithi Hospital*: U Krairittichai, P Indrasthitya; *Ramathibodi Hospital, Bangkok*: V Sumethkul, A Ingsathit, J Jansomwong, K Lertchalararn, V Phachiyankul, T Phiromkit, S Saengsri; *Siriraj Hospital, Bangkok*: K Vareesangthip, R Chawanasantorapoj, K Kiattisunthorn, R Larpkitkachorn.

## UK

*Aberdeen Royal Infirmary*: J Webster, J Henderson; *Addenbrooke's Hospital, Cambridge*: D Jayne, J Hollis, K Townsend; *Antrim Hospital*: C Harron, N Bleakley, N Hanley; *Basildon Hospital*: S Morgan, L Brittny; *Belfast City Hospital*: H Brown, P Maxwell, N Bleakley, N Hanley, H Murtagh; *Birmingham Heartlands*: M Thomas, E Burke, M Carmody, G Cox, J Dasgin; *Broomfield Hospital*: G Ali, L Whitehouse, V Williams; *Charing Cross and Hammersmith Hospital*: E Brown, P Maxwell, G Dlelana, A Esson, S Fagerbrink, F Marshall, B Mazibuko, C Nelson, E Russell, R Williams; *Churchill Hospital, Oxford*: P Altmann, C McNichols-Thomas, K Parsons; *Crosshouse Hospital, Kilmarnock*: M MacGregor, J McGowan; *Cumberland Infirmary, Carlisle*: P Mead, K Gilbanks, M Sanderson; *Derby City General Hospital*: R Fluck, G Chandler, L Hulme, J Smith; *Derriford Hospital, Plymouth*: Y Tse, C West; *Dorset County Hospital*: J Taylor, S Breakspear, B Burgess; *Dumfries and Galloway Royal Infirmary*: C Isles, J Bell, J Duignan, J Gorman; *Edinburgh Royal Infirmary*: C Swainson, C Beveridge, A Cairns, C Johnston, D Miller, F Paterson, L Smith; *Glan Clwyd Hospital*: M Kumwenda, R Glover; *Glasgow Western Infirmary*: C Geddes, C Gemmell, I Grieve, C Johnston, E Matthews, B McLaren, B Meyer, A Spiers; *Gloucestershire Royal Hospital*: R Banks, P Apperley, T Patterson, H Paynter; *Guys Hospital, London*: J Scoble, D Thom, J Watkins; *Hope Hospital, Salford*: P Kalra, S Gowland, L Haydock, I Smart; *Hull Royal Infirmary*: S Bhandari, D Lewis, P Gillett, K James, R Lewis, H Melville, A Tamimi; *Ipswich Hospital*: P Williams, K Brown, T Heath, S Small; *James Cook University Hospital, Middlesbrough*: A Paterson, N Gibson, C Laven, R Reaich, T Wilson; *King's College Hospital, London*: H Cairns, K Casley-Ready; *Leicester General Hospital*: G Warwick, B Fentum, J James, T Kumar, R Marshall, F Ratcliffe, A Shenton; *Lister Hospital, Stevenage*: P Warwicker, M Bowser, C Mumford; *Manchester Royal Infirmary*: S Mitra, S Johnson, J Morgan; *Middlesex Hospital*: R Woolfson, R Yang; *Morrison Hospital, Swansea*: A Williams, K Richards, M Thomas, A Turner; *New Cross Hospital, Wolverhampton*: J Odum, P Rylance, A Smallwood, J Ward; *Ninewells Hospital, Dundee*: I Henderson, M McMahon; *Norfolk and Norwich University Hospital*: C Ross, M Burrows, J Morais, S Rajan; *North Middlesex University Hospital*: H Tindall, C Barrett, F Kelly; *Northern General Hospital, Sheffield*: M El-Nahas, J Bartholomew, L Edwards, F Okhuoya; *Nottingham City Hospital*: C Bebb, M Cassidy, S Brand, M Quashie-Howard, C Taggart; *Princess Royal Hospital, Telford*: N Capps, D Donaldson, L Tonks; *Queen Alexandra Hospital, Portsmouth*: J Mason, S Powell, L Watkins; *Queen Elizabeth Hospital, Birmingham*: S Ball, M Dutton, L Fifer, F McGlynn; *Queen Margaret Hospital, Dunfermline*: M Wood, D Jenkins, N Allan, K Chalmers; *Queen's Hospital, Romford*: I Fahal, H Elhag-Ali, J King; *Raigmore Hospital*: R Peel, L Potts, I Logie, F McGhie; *Royal Berkshire Hospital*: R Naik, J King; *Royal Cornwall Hospital*: R Parry, K Andain, S Durkin; *Royal Devon and Exeter Hospital*: R D'Souza, D Harrison; *Royal Free Hospital, London*: DC Wheeler, J Cooke, R Kinyanjui, S Smith; *Royal Liverpool Hospital*: J Harper, K Algate, M McCarthy, D Van Eker; *Royal London Hospital*: R Thuraisingham, M Chinodya, V Deelchand, R Garcia, R Ngango, C Rolfe, K Williams; *Royal Preston Hospital*: L Solomon, T Heap, P MacDowall, L Saunderson Smith; *Royal Sussex County Hospital*: A MacDiarmid-Gordon, W Harman, H Smithson; *Sandwell General Hospital, West Bromwich*: D Robertson, B Gammon, D O'Grady, C Verow; *Southampton General Hospital*: M Rogerson, L Berry, C Gough, E Hayward, C Jones, T Payne, L Rowe, C Sibley, J Szymanski; *Southend Hospital*: M Almond, M Farrell; *Southmead Hospital*: C Tomson, L Bourton, C Bromwich, H Corderoy, S Dawson, S Mason; *St George's Hospital, London*: D Oliveira, R Ramkhalawon, J Tuazon; *St Helier Hospital, Carshalton*: P Andrews, K Archer, A Moore, G Thomas, C Velazquez; *St Luke's Hospital, Bradford*: R Mumtaz, R Roberts, F Farquhar, J Ott; *Sunderland Royal Hospital*: S Fenwick, A Callaway, D Donaldson; *Tyrone County Hospital*: P Garrett, L Dees, U McDonagh; *University Hospital of North Staffordshire*: J Wessels, S Garner, K James; *Walsgrave*

*Hospital*: D Zehnder, N Aldridge, C Dyer, M Gomez, S Hewins, K McCarthy, J Rush; *Worcestershire Royal Hospital*: S Spencer, K Brown, M Harvey, H Mills; *Wrexham Maelor Hospital*: P Drew, M Henry, S Wilberforce; *York Hospital*: D Worth, Z Adair, J Hartley; *Ysbyty Gwynedd*: M Jibani, D Jones.

## USA

*DaVita Clinical Research/Hennepin County Medical Center, Minneapolis*: S Swan, T Shamp, H Alcorn, Jr., J Booke, C Cannon, K Jarvis, C Muesing, H Muster, M Murphy, M Planting, C Strand; *Duke University Medical Center, Durham*: J Middleton, K Gitter, N Mace, D Schumm; *Harlem Hospital Center/Columbia University*: V Pogue, B Alimohammadi, H Anderson, P Arora, L Herbert, J Cheng, D Dowie, S Mohan, G Peters; *Heart Institute of Spokane*: K Tuttle, S Albritton, R Benedetti, S Joshi, B Lund, L Shuler; *Innovative Research of West Florida, Inc.*: M Trevino, K Mai, T Osborn; *Johns Hopkins University Hospital, Baltimore*: R Parekh, J Eustace, G Novak, S Patterson; *Kansas City VA Medical Center - 1*: C Lindsey, T Hill, M Liston; *Kansas City VA Medical Center - 2*: T Wiegmann, A Nagaria, C Hurd, A Hurst, E Omoscharka, S Parks, G Peters, V Price, D Schouten; *Kelsey -Seybold Research Foundation, Houston*: H Rashid, K Birtcher, J Cantu, S Johnson, C Tait, W Taun; *Kidney Associates, PLLC, Houston*: S Fadem, D Das, U Khosla, C Brown, T Brown, J Buquing, H Cromwell, N Dickson, B Najimipour, J Robeson, W Tabibi; *Medical College of Georgia*: L Mulloy, K Bailey, B Burton, P Fall, M Jagadeesan, W Paulson, H Szerlip, J White; *Meharry Medical College, Nashville*: M Faulkner, O Adeleye, D Boatright, D Mensah, U Nwankwo, L Crutcher, C Cummings, M Floyd, B Putatunda, J Ross, V Sanford; *Oklahoma City VA Medical Center*: U Thadani, L Haragsim, B Parker, L Rogan, M Thresher, J Turner; *Rhode Island Hospital*: L Dworkin, D Mignano, A O'Mara, D Shemin; *Rush University Medical Center, Chicago*: G Bakris, E Basta, D Chua, G Neri, I Ahmed, W Elliott, L Fondren, N Hasabou, N Khosla, A Mazin, J Riehle; *Salem VA Medical Center*: C Kovesdy, J Mendoza, S Ahmadzadeh, A Iranmanesh, M Lewis, J Lu; *San Juan VAMC*: J Benabe, E Gonzalez-Melendez, B Padilla, J Serrano; *St. Mary's Duluth Clinic*: T Russ, L Athmann, L Funke, P Larson, D Roach, B Salveson; *University of Maryland, Division of Nephrology*: J Nogueira, D Hanes, M Hise, P Light, E Copland, J Fink, M Hakim, K Hough, S McMinn, M Weir, C Young; *University of Massachusetts Medical Center*: G Kershaw, I Hill, B White; *University of Nebraska Medical Center*: T Plumb, M Florescu, G Groggel, M Martin, V Rao; *University of North Carolina*: C Denu-Ciocca, C Candiani, J Cooper, B Gordon, M Joy, M Kiser, C Lambeth; *University of Pennsylvania*: S Rosas, P Cochetti, J Robinson, K Schankel, H Teng; *University of Vermont / Fletcher Allen Health Care*: W Weise, A Geneidy, P Murray, R Solomon, D de Waal, S LaPointe, A Schoenknecht; *USC/Keck School of Medicine, Los Angeles*: V Campese, M Habashy, R Ananthakrishna, D Bedwani, U Fazli, M Fetrat, Q Frampton, B Kaldas, V Kazarian, L Pitts, A Sadeghi, N Yeasmin; *VA Ann Arbor Healthcare System*: E Young, R Fissell, K Belanger, N Ricci; *VA Boston Healthcare System, Jamaica Plain Campus*: W Farwell, T Bowman, R Dhingra, A Pesenson, J Ambrosino, S Chittamooru, J Kaufman, M Ramos; *VA Southern Nevada Healthcare System (VASNHS)*: C Yap, S Nakhle, L Aligaen, D Duren, B Laine, S Moore, H Tuazon; *Washington University School of Medicine*: D Coyne, J Audrain, B Bryant, S Dombek, S Freeman, P Klein; *Western New England Renal & Transplant Associates (WNERA), Springfield*: M Germain, A Berkowitz, A Bokhari, G Braden, A Diaz, B Greco, J Mulhern, M O'Shea, A Poindexter, D Poppel, M Ryan, S Sweet, J Ye; *Wm. Jennings Bryan Dorn VA Medical Center, Columbia*: J Osterman, T Lin, B Mays, A Rizvi, C Sonnier, C Twining, S Wang, M Hix, J Schenck.
